# Supplementary material
Source: publisher site journal article supplement (https://www.dovepress.com/article/402717)

Tables S1. Unadjusted and adjusted logistic regression models of PNI and adverse hospitalization outcomes

| Adverse hospitalization outcomes | Crude model<br>OR (95%CI) | Model 1<br>OR (95%CI) | Model 2<br>OR (95%CI) |
|----------------------------------|---------------------------|-----------------------|-----------------------|
| PNI                              | 0.91 (0.89, 0.93)         | 0.91 (0.89, 0.93)     | 0.96 (0.93, 0.99)     |
| PNI tertile                      |                           |                       |                       |
| Low tertile                      | 1.00 (Ref)                | 1.00 (Ref)            | 1.00 (Ref)            |
| Middle tertile                   | 0.49 (0.26, 0.94)         | 0.48 (0.36, 0.64)     | 0.75 (0.50, 1.11)     |
| High tertile                     | 0.21 (0.09, 0.49)         | 0.21 (0.15, 0.30)     | 0.39 (0.23, 0.68)     |
| <i>P</i> for trend               | <0.0001                   | <0.0001               | 0.0014                |

Notes: Model 1 adjusted for sex, age, BMI, smoking status and aCCI; Model 2 further adjusted for comorbidities (including diabetes, hypertension, arrhythmia, congestive heart failure, chronic kidney disease and coronary artery disease), leukocytes, platelets, eosinophils, hemoglobin, blood urea nitrogen, serum sodium, serum potassium, serum calcium, total cholesterol, NT-proBNP, pH, PaCO<sub>2</sub>, required NIMV, and aCCI.

Tables S2. The results of the two-piecewise linear regression model

|                                                  | OR   | 95%CI        | <i>P</i> value |
|--------------------------------------------------|------|--------------|----------------|
| Fitting model by standard linear regression      | 0.95 | 0.91 to 0.98 | 0.0013         |
| Fitting model by two-piecewise linear regression |      |              |                |
| The inflection point of PNI                      |      |              |                |
| <42                                              | 0.88 | 0.83 to 0.93 | <0.0001        |
| ≥42                                              | 1.03 | 0.97 to 1.08 | 0.3807         |
| <i>P</i> for the log-likelihood ratio test       |      | <0.001       |                |

Adjusted: Sex, age, BMI, smoking status, comorbidities (including hypertension, diabetes, arrhythmia, congestive heart failure, chronic kidney disease and coronary artery disease), leukocytes, platelets, eosinophils, hemoglobin, blood urea nitrogen, serum sodium, serum potassium, serum calcium, total cholesterol, NT-proBNP, pH, PaCO<sub>2</sub>, required NIMV, and aCCI.

Fig. S1 The relationship between PNI and adverse hospitalization outcomes. A nonlinear relationship was observed between the PNI and the adverse hospitalization outcomes after adjusting for sex, age, BMI, smoking status, comorbidities (including

hypertension, diabetes, arrhythmia, congestive heart failure, chronic kidney disease and coronary artery disease), leukocytes, PLT, Eos, Hb, BUN, TC, NT-proBNP, pH, PaCO<sub>2</sub>, serum potassium, serum calcium, serum sodium, required NIMV, and aCCI.

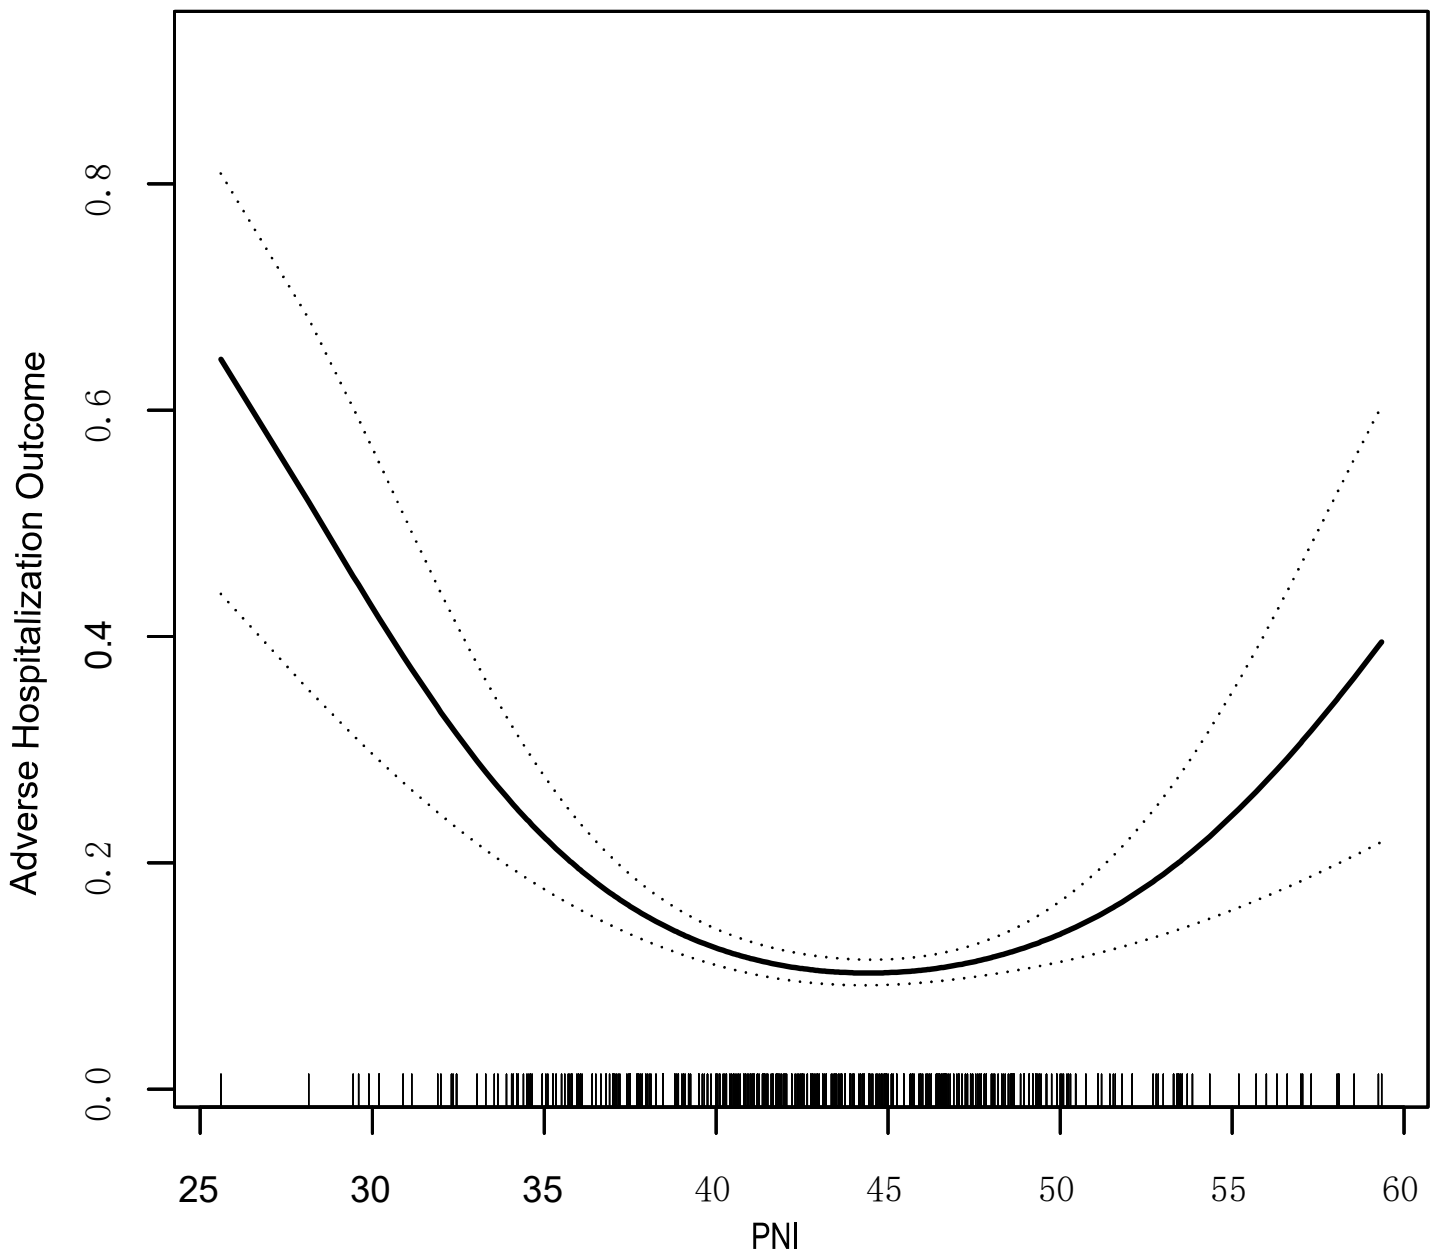

Supplement: Supplementary file 1 [file get_supplementary_file.php]
